# Supplementary material for: Novel Brønsted Acidic Ionic Liquids as High Efficiency Catalysts for Liquid-Phase Beckmann Rearrangement
Source: MDPI journal article supplement (doi:10.3390/catal13060978), 2023-06-06
Supplement: s1 [file s1]

# Novel Brønsted Acidic Ionic Liquids as High Efficiency Catalysts for Liquid-Phase Beckmann rearrangement

## 1. Characterization

The Model Shimadzu UV 2550 UV–vis spectrophotometer was used to determine the Hammett Brønsted acid scales ( $H_0$ ) of ILs with ethanol as a reference. The content of water in ILs was determined by the Karl Fischer method (CBS–1A). The density of ILs was determined by the pycnometer method. The viscosity of ILs was determined with Anton-Paar SVM automatic motion viscometer at 25 °C. Electrochemical stability was analyzed at a sweep rate of 50 mVs<sup>-1</sup>.by cyclic voltammetry using an IVIUM V13806 Instruments Electrochemical Work Station at room temperature.

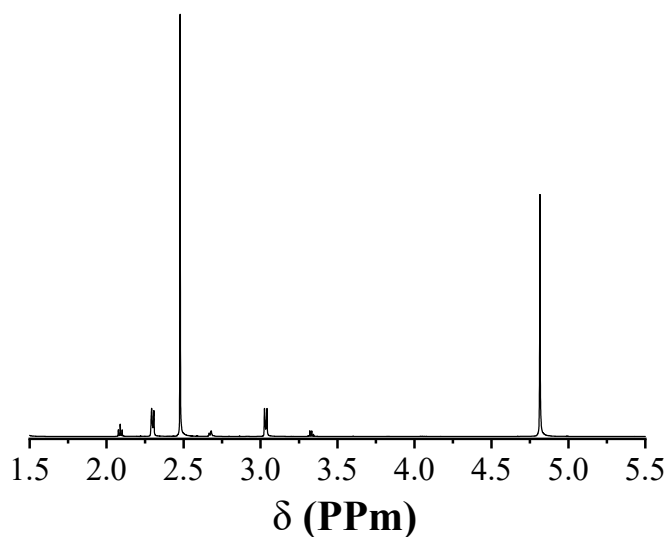

<sup>1</sup>H 4.82(s), 3.33(s), 3.03(m), 2.68(s), 2.48(s), 2.30(m), 2.09(s)

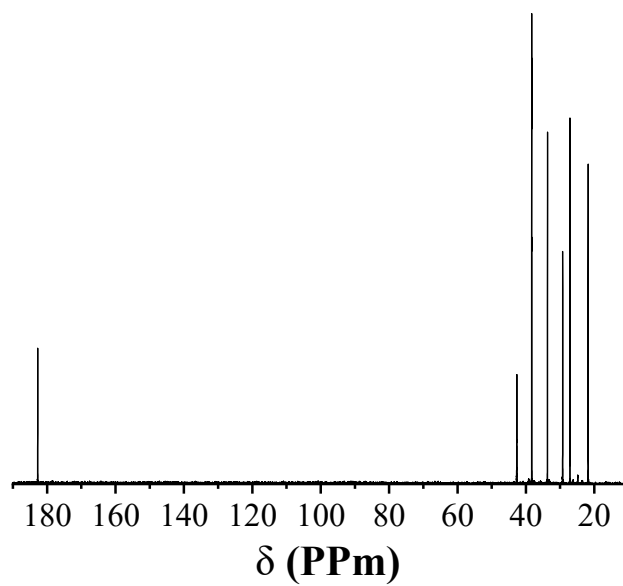

$^{13}\text{C}$  182.74, 42.64, 38.27, 33.70, 29.23, 27.10, 21.79

Figure S1. NMR spectrum of [CPL][2MSA].

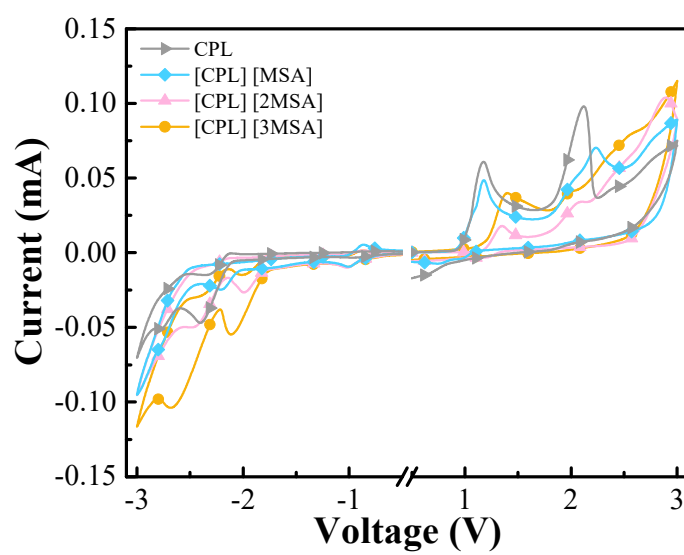

Figure S2. The electrochemical spectra of different samples.

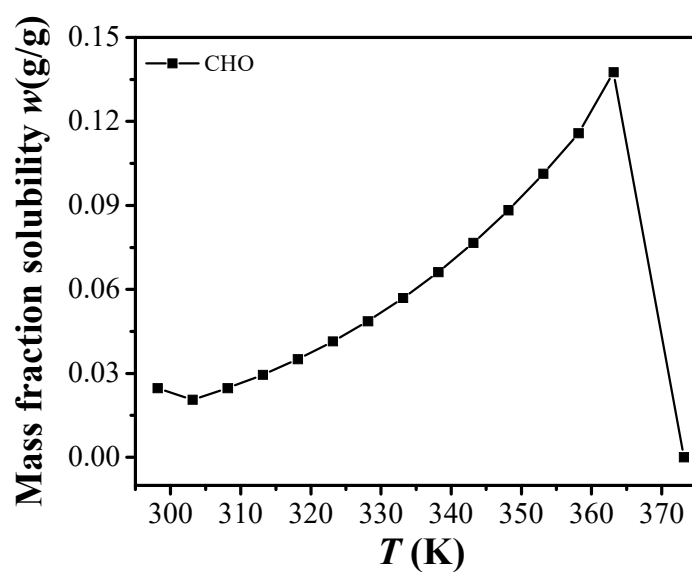

Figure S3. Predicted results for capacity of CHO in [CPL][2MSA] by COSMO-RS.

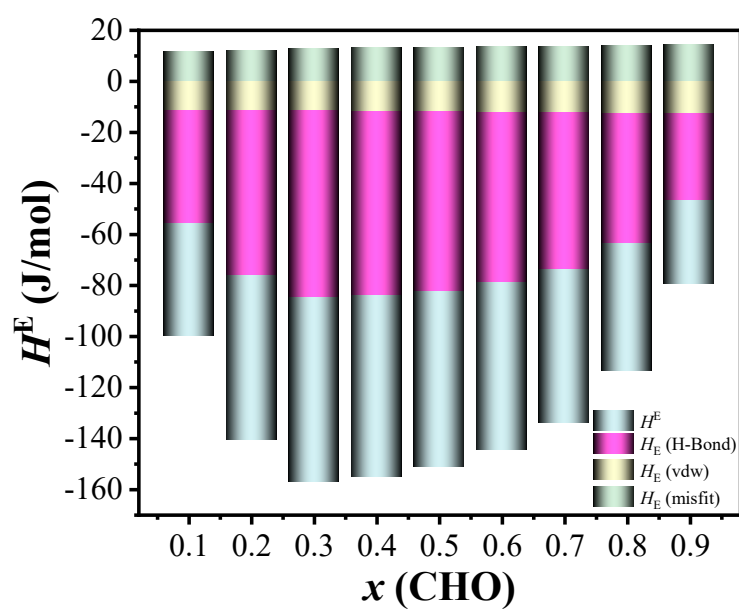

Figure S4. Excess enthalpies of CHO in [CPL][2MSA] at  $T = 363.15$  K.
